# Supplementary material for: Spike Gene Evolution and Immune Escape Mutations in Patients with Mild or Moderate Forms of COVID-19 and Treated with Monoclonal Antibodies Therapies
Source: MDPI journal article supplement (doi:10.3390/v14020226), 2022-01-24
Supplement: s1 [file s1]

**Table S1** : Experimental conditions for the amplification and sequencing of the full sequence of the Spike gene

**Primers sequences**

| <b>Amplicon A</b> | <b>Primers</b> | <b>Sequence 5' – 3'</b>    | <b>PCR products (size, bp)</b> |
|-------------------|----------------|----------------------------|--------------------------------|
| 1st PCR           | Forward        | AGGGGTACTGCTGTTATGTCT      | 2192                           |
|                   | Reverse        | CCCGCCGAGGAGAATTAGTC       |                                |
| Nested PCR A1     | Forward        | AACAACAGAGTTGTTATTTCTAGTGA | Around 800                     |
|                   | Reverse        | CCTGAGGGAGATCACGCAC        |                                |
| Nested PCR A2     | Forward        | TCTCTCAGCCTTTTCTTATGGACC   | Around 800                     |
|                   | Reverse        | TTCCAAGCTATAACGCAGCCT      |                                |
| Nested PCR A3     | Forward        | TCTGCTTTACTAATGTCTATGCAGA  | Around 800                     |
|                   | Reverse        | GTTGTTGACATGTTTCAGCCCC     |                                |
| <b>Amplicon B</b> | <b>Primers</b> | <b>Sequence 5' – 3'</b>    | <b>PCR products (size, bp)</b> |
| 1st PCR           | Forward        | TGCACAGAAGTCCCTGTTGC       | 2112                           |
|                   | Reverse        | CGAAAGGGAGTGAGGCTTGT       |                                |
| Nested PCR B1     | Forward        | AACTTACTCCTACTTGGCGTGT     | Around 800                     |
|                   | Reverse        | CATCTGTGAGCAAAGGTGGC       |                                |
| Nested PCR B2     | Forward        | CACTTGCAGATGCTGGCTTC       | Around 800                     |
|                   | Reverse        | CTTCACGAGGAAAGTGTGCT       |                                |
| Nested PCR B3     | Forward        | CCCTCAGTCAGCACCTCATG       | Around 800                     |
|                   | Reverse        | GCATCCTTGATTTCACCTTGC      |                                |

**Amplification program**

| <b>1st PCR<br/>Amplicon A and B</b>                          | <b>Thermal profile</b> | <b>Cycle</b> | <b>Time</b>  | <b>Temperature</b> |
|--------------------------------------------------------------|------------------------|--------------|--------------|--------------------|
|                                                              | Reverse transcription  | 1            | 45 min       | 45°C               |
|                                                              | Initial denaturation   | 1            | 2 min        | 95°C               |
|                                                              | Denaturation           | 40           | 30 s         | 95°C               |
|                                                              | Annealing              |              | 30 s         | 55°C               |
|                                                              | Elongation             |              | 2 min        | 68°C               |
|                                                              | Final elongation       | 1            | 7 min        | 68°C               |
|                                                              | Cooling                | 1            | indefinitely | 10°C               |
| <b>Nested PCR<br/>Amplicon A1, A2, A3,<br/>B1, B2 and B3</b> | <b>Thermal profile</b> | <b>Cycle</b> | <b>Time</b>  | <b>Temperature</b> |
|                                                              | Initial denaturation   | 1            | 5 min        | 94°C               |
|                                                              | Denaturation           | 45           | 30 s         | 94°C               |
|                                                              | Annealing              |              | 30 s         | 55°C               |
|                                                              | Elongation             |              | 1 min        | 72°C               |
|                                                              | Final elongation       | 1            | 7 min        | 72°C               |
|                                                              | Cooling                | 1            | indefinitely | 10°C               |
